# Supplementary material for: Brewer’s Spent Yeast Cell Wall Polysaccharides as Vegan and Clean Label Additives for Mayonnaise Formulation
Source: MDPI journal article supplement (doi:10.3390/molecules28083540), 2023-04-17
Supplement: s1 [file s1]

# Brewer's Spent Yeast Cell Wall Polysaccharides as Vegan and Clean Label Additives for Mayonnaise Formulation

Sofia F. Reis <sup>1</sup>, Pedro A. R. Fernandes <sup>1,2</sup>, Vítor J. Martins <sup>1</sup>, Sara Gonçalves <sup>1</sup>, Luís P. Ferreira <sup>2</sup>, Vítor M. Gaspar <sup>2</sup>, Diogo Figueira <sup>3</sup>, Diogo Castelo-Branco <sup>3</sup>, João F. Mano <sup>2</sup>, Manuel A. Coimbra <sup>1</sup> and Elisabete Coelho <sup>1,\*</sup>

**Table S1.** Texture parameters of mayonnaise models with different additives including BSY extracts.

| Additive              | Firmness<br>(g) | Consistency<br>(g.s) | Cohesiveness<br>(g) | Work of Cohesion<br>(g.s) |
|-----------------------|-----------------|----------------------|---------------------|---------------------------|
| Xanthan gum           | 35±1            | 875±83               | -34±1               | -48±1                     |
| Freeze-dried egg yolk | 8.0±0.1         | 229±10               | -6.0±0.1            | -1.5±0.1                  |
| Modified starch       | 8.3±0.7         | 176±14               | -6.4±0.2            | -1.5±0.1                  |
| Sn 1M                 | 8.7±0.2         | 214±28               | -6.7±0.2            | -1.7±0.1                  |
| Sn 4M                 | 7.9±0.0         | 193±15               | -6.0±0.1            | -1.4±0.1                  |
| pp 4M                 | 8.4±0.2         | 209±15               | -6.6±0.2            | -1.7±0.1                  |
| pp 200°C              | 8.1±0.1         | 210±13               | -6.4±0.1            | -1.6±0.1                  |

**Table S2.** Texture parameters of a standard mayonnaise and mayonnaises with addition of BSY extracts.

| Additive | Firmness<br>(g) | Consistency<br>(g.s) | Cohesiveness<br>(g) | Work of Cohesion<br>(g.s) |
|----------|-----------------|----------------------|---------------------|---------------------------|
| Standard | 96±3            | 2709±167             | -114±4              | -169±6                    |
| Sn 1M    | 14±1            | 219±30               | -16±2               | -7.7±1.6                  |
| Sn 4M    | 11±0            | 171±2                | -10±0               | -2.4±0.1                  |
| pp 4M    | 63±1            | 1723±89              | -63±2               | -87±5                     |
| pp 200°C | 12±0            | 188±2                | -11±0               | -2.6±0.2                  |
